37 **Abstract**

38 Homeotic genes code for key transcription factors (HOX-TFs) that pattern the animal body  
39 plan. During embryonic development, Hox genes are expressed in overlapping patterns and  
40 function in a partially redundant manner. *In vitro* biochemical screens probing the HOX-TF  
41 sequence specificity revealed largely overlapping sequence preferences, indicating that co-  
42 factors might modulate the biological function of HOX-TFs. However, due to their  
43 overlapping expression pattern, high protein homology, and insufficiently specific  
44 antibodies, little is known about their genome-wide binding preferences. In order to  
45 overcome this problem, we virally expressed tagged versions of limb-expressed posterior  
46 *Hox* genes (*Hoxa9-13*, and *Hoxd9-13*) in primary mesenchymal limb progenitor cells  
47 (micromass). We determined the effect of each HOX-TF on cellular differentiation  
48 (chondrogenesis) and gene expression and found that groups of HOX-TFs induce distinct  
49 regulatory programs. We used ChIP-seq to determine their individual genome-wide binding  
50 profiles and identified between 12,540 and 27,466 binding sites for each of the nine HOX-  
51 TFs. Principal Component Analysis (PCA) of binding profiles revealed that the HOX-TFs are  
52 clustered in two subgroups (Group 1: HOXA/D9, HOXA/D10, HOXD12, and HOXA13 and  
53 Group 2: HOXA/D11 and HOXD13), which are characterized by differences in their sequence  
54 specificity and by the presence of cofactor motifs. Specifically, we identified CTCF binding  
55 sites in Group 1, indicating that this subgroup of HOX-proteins cooperates with CTCF. We  
56 confirmed this interaction by an independent biological assay (proximity ligation assay) and  
57 showed that CTCF is a novel HOX cofactor that specifically associates with Group 1 HOX-TFs,  
58 pointing towards a possible interplay between HOX-TFs and chromatin architecture.

59

## 60 **Introduction**

61 The homeotic genes (*Hox* genes) are key regulators of development. They encode  
62 homeodomain transcription factors (HOX-TFs) that are expressed in an overlapping fashion  
63 along the anterior-posterior axis in all metazoans (McGinnis and Krumlauf 1992). In the  
64 vertebrate genome, *Hox* genes are organized in clusters with their order reflecting not only  
65 their expression along the anterior-posterior body axis but also their temporal expression  
66 (spatio-temporal collinearity). In most vertebrates, two rounds of whole-genome duplication  
67 have resulted in four clusters of *Hox* genes, coding for a total of 39 HOX-TFs. All HOX-TFs  
68 show high levels of sequence conservation between paralog groups (e.g. HOXA9 and HOXD9)  
69 and to a lesser extent between genes of the same cluster (e.g. HOXA1 to HOXA13) (reviewed  
70 in Gehring et al. 2009; Rezsöházy et al. 2015).

71 In the developing vertebrate limb, the posterior genes of the *HoxA* and *HoxD* clusters (*HOX9-*  
72 *13*) are expressed along the proximo-distal axis following a collinear strategy (Zakany and  
73 Duboule 2007). Genetic experiments inactivating individual *Hox* genes revealed a remarkable  
74 redundancy within paralog groups controlling the development of the proximal (stylopod),  
75 middle (zeugopod), and distal (autopod) parts of the limb (Boulet and Capecchi 2004; Zakany  
76 et al. 2004). For example, neither the homozygous deletion of *Hoxa11* nor *Hoxd11* in mice  
77 leads to substantial malformations of the stylo-, or zeugopods. However, deletion of both  
78 *Hoxa11* and *Hoxd11* causes a severe truncation of the stylopod and loss of the zeugopod  
79 (Davis et al. 1995; Raines et al. 2015). A similar redundancy is observed between genes of  
80 the same cluster. Deletions, in mice, that encompass the entire *Hoxd13* gene cause the  
81 adjacent *Hoxd12* to be expressed in a *Hoxd13*-like pattern associated with the functional  
82 rescue of the *Hoxd13* deficiency. A similar deletion, removing *Hoxd13* and *Hoxd12* causes  
83 *Hoxd11* to be expressed in a *Hoxd13*-like pattern; however, *Hoxd11* is not able to rescue the  
84 loss of its two adjacent paralogs (Kmita et al. 2002).

85 In spite of the insights gained by these elegant series of genetic experiments, the high  
86 degree of *Hox* protein similarity and the overlap of expression domains have hindered the  
87 elucidation of the individual HOX-TF functions. HOX-TFs were also included in large  
88 biochemical surveys to identify the specific binding sequence of transcription factors (Berger  
89 et al. 2008; Jolma et al. 2013; Jolma et al. 2015). Two complementary studies applying  
90 protein binding microarrays (PBM) and SELEX-seq on purified DNA-binding domains  
91 demonstrated that all posterior HOX-TFs bind to similar AT-rich sequences that vary in their

92 5' region, but share a characteristic TAAA sequence in their 3' half. Moreover, two NMR  
93 based studies showed binding of HOXA13 to the HOXD13 site and *vice versa* (Zhang et al.  
94 2011; Turner et al. 2015). Thus, the DNA binding specificity is not sufficient to explain  
95 individual HOX-TF function. More recent studies revealed a crucial role for cofactors in HOX-  
96 TF specificity. HOX-cofactors were shown to specifically alter the recognition sequence of  
97 the HOX-TFs by forming heterodimers (Joshi et al. 2007; Slattery et al. 2011; Jolma et al.  
98 2015). Moreover, the analysis of HOX-cofactor specific binding sites suggested that these  
99 altered binding sites might be functionally more relevant for HOX binding than the HOX-TFs  
100 binding sites themselves (Crocker et al. 2015). However, due to high sequence homology,  
101 inadequate antibody specificity, and overlapping expression patterns little is known about  
102 genomic binding of the different HOX-TFs and how this might relate to their biological  
103 function.

104 Here, we have analysed and systematically compared the effects of nine limb bud-expressed  
105 HOX-TFs (HOXA9-13 and HOXD9-13) on cell differentiation and gene regulation and compare  
106 their genome-wide binding characteristics. To mimic the natural HOX environment as closely  
107 as possible, we used mesenchymal chicken limb bud cells and mild retroviral overexpression  
108 (Ibrahim et al. 2013). In this primary cell culture system (chicken micromass, chMM) the cells  
109 normally undergo chondrogenic differentiation; a process that can be altered by virally  
110 expressed transgenes (Ibrahim et al. 2013). Given the identical cell origin, culture conditions,  
111 and antibody use, this system allowed us to assess the distinctive properties of each HOX-TF  
112 and compare them to each other.

113 We find that certain HOXA/HOXD paralog TFs have opposing effects on chondrogenic  
114 differentiation and induce distinct regulatory programs in transduced cells. Further, by  
115 comparing the genome-wide DNA binding of nine HOX-TFs, in this experimental setting, we  
116 find that the posterior HOX-TFs can be separated into two groups (Group 1 and Group 2),  
117 with distinct binding motifs and distinct associations with cofactors. Finally, we characterized  
118 CTCF (the CCCTC-binding factor) as a novel cofactor of HOX-TFs and show that Group 1 but  
119 not Group 2 HOX-TFs bind thousands of CTCF-occupied sites in the chicken genome.

120

121

122

123 **Results**

124 **Posterior HOX-TFs have distinct effects on gene regulation and differentiation of**  
125 **mesenchymal limb bud cells**

126 To systematically compare the function of posterior HOX-TFs, we virally expressed FLAG-  
127 tagged versions of each TF in chicken micromass (chMM) cultures. First, we assessed the  
128 effect induced by the different HOX-TFs on chMM cultures. We noticed that some HOX-TFs  
129 promoted chondrogenic differentiation (HOXA9, HOXA10, HOXD10), while others inhibited  
130 the process (HOXD9, HOXD11, HOXA11, HOXD12, HOXA13, and HOXD13) (Figure 1A).

131 Interestingly, paralogue HOX-TFs did not always have the same general impact on the  
132 chondrogenic differentiation of the chMM. While *HOXA9* stimulated chondrogenic  
133 differentiation, its paralog *HOXD9* inhibited the same process. In contrast, *HOXA10* and  
134 *HOXD10* both promoted chondrogenic differentiation. *HOXA11* and *HOXD11* both inhibited  
135 chondrogenic differentiation, but to a very different extent. Finally, *HOXD13* and *HOXA13*  
136 both strongly inhibited cartilage formation; however, Eosin staining showed that the cell  
137 morphology of the *HOXA13*-expressing chMM was quite distinct from *HOXD12* or *HOXD13*  
138 cultures (Figure 1A).

139 The simple readout of the chMM morphology showed that the HOX-TFs induce distinct  
140 effects on cell differentiation. In order to comprehensively compare the effects on gene  
141 expression, we performed RNA-seq of HOX-TF expressing chMM cultures. We used DEseq2  
142 (Love et al. 2014) to generate a list of genes that were differentially regulated compared  
143 with mock-infected chMM cultures. We then used the genes that were found among the 50  
144 most strongly regulated genes in any of the nine datasets for hierarchical clustering (Figure  
145 1B, Supplemental Table 1).

146 The hierarchical clustering recapitulated some of the main differences found between HOX-  
147 TFs that were detected in chMM gross morphology. HOX10 and HOX11 paralogs clustered  
148 together, while HOX9 paralogs, which bore striking differences in chMM morphology,  
149 clustered apart. Furthermore, the clustering process classified the paralog groups in an order  
150 that partially corresponded to their known role in limb development. The clustering  
151 separated the stylo-/zeugopod expressed HOX-TFs (*HOXD9*, *HOX10/11*) from the autopod  
152 expressed *HOXD12/13*. Two factors, *HOXA9* and *HOXA13*, clustered separately from all other  
153 HOX-TFs, indicating that the regulatory programs these factors induce are distinct from the

154 other posterior HOX-TFs. Moreover, the *HOX11* paralogs induced transcriptional programs  
155 so similar to one another that the clustering algorithm was not able to separate the two  
156 replicate datasets from each factor. Interestingly, two genes coding for subunits of the AP1  
157 class of transcription factors, *JUN* and *FOS*, were among the most strongly upregulated  
158 genes in all of the datasets, suggesting that they might be direct targets of HOX-TFs. Our  
159 analysis shows that, despite high homology and functional redundancy *in vivo*, the direct  
160 effects of paralog HOX-TFs in chMM cultures are distinct. While some can be similar  
161 (*HOXA10/HOXD10* and *HOXA11/HOXD11*) others can have opposing effects  
162 (*HOXA13/HOXD13* and *HOXA9/HOXD9*).

163

#### 164 **Genome-wide binding reveals two distinct groups of HOX-TFs**

165 We next wanted to assess whether analogous differences could be observed between  
166 paralog groups in their genome-wide binding preferences. We generated ChIP-seq profiles of  
167 the virally expressed HOX-TFs in chMM cultures using the  $\alpha$ FLAG antibody. We identified  
168 between 12,540 and 27,466 binding sites for each of the nine HOX-TFs (Figure 2). We first  
169 assessed the binding sites shared between HOX-TFs from the same paralog groups by taking  
170 the 10,000 strongest peaks for each factor and then calculated the pairwise overlap between  
171 all HOX-TFs. Similar to the results of the expression analysis, the HOX10 and HOX11 paralogs  
172 shared more peaks (78-81% and 85-86%, respectively) than the HOX9 and HOX13 paralogs  
173 (65-60% and 24-16%) (Supplemental Figure 1A).

174 Next, we performed a principal components analysis (PCA) to compare the datasets in an  
175 unbiased way, using the identified peaks as input (Figure 2B). PCA showed that the binding  
176 of HOX-TF paralogs seemed to be more similar than their effects on chMM differentiation  
177 and gene expression. HOXA13 and HOXD13 were a notable exception as they clustered  
178 separately from the other HOX-TFs along PC1 (Figure 2B, dashed box). In addition, they were  
179 also very different from one another in PC2. A comparison of all tested HOX-TFs in PC2  
180 revealed a surprising separation into two groups, which neither reflected the effects on cell  
181 differentiation and gene expression, nor the sequence homology of the TFs. Group 1  
182 comprised HOXA/D9, HOXA/D10, HOXD12, and HOXA13 (Figure 2B, blue) and Group 2  
183 comprised HOXA/D11 and HOXD13 (Figure 2B, black).

184 To find a possible cause for this separation, we first tested whether the grouping could be  
185 attributed to the sequence-specificity of the TFs. For this we performed *de novo* motif  
186 analysis using the peak-motifs algorithm (Medina-Rivera et al. 2015) with the 5,000  
187 strongest peaks as input and compared it to the published results from PBM and SELEX-seq  
188 (Figure 2C and Supplemental Figure 1B). This comparison showed a general similarity  
189 between *in vitro* and ChIP-seq derived motifs. However, several sequence features had not  
190 been detected in the previously published datasets. We found a prominent G at the 5' end of  
191 all Group 1 motifs (HOXA/D9, HOXA/D10, HOXD12, and HOXA13), which had also been  
192 detected using SELEX-seq (Jolma et al. 2013). More striking, we found that the TAAA 3' end,  
193 which is a characteristic of posterior HOX-TFs, changed to a TGAAA in all Group 1 HOX-TFs,  
194 with the notable exception of HOXA13.

195 The motifs identified for HOXA13 and HOXD13 were identical to the ones detected in  
196 PBM/SELEX-seq. In contrast, the primary motif of HOXA11 and HOXD11 did not overlap with  
197 those detected in the corresponding *in vitro* datasets. Specifically, the CCATAAA motif  
198 (HOXA/D11) we observed was highly similar to a change in sequence specificity that HOXA10  
199 undergoes when co-binding with PBX4 (Jolma et al. 2015). Generally, motif analysis for the  
200 HOX-TFs identified not only primary motifs, but also several alternative HOX-like motifs,  
201 suggesting that the DNA-dependent binding of HOX-TFs might be less sequence-driven than  
202 other TFs (Supplemental Figure 1B).

203 Group 1 (HOXA/D9, HOXA/D10, HOXD12, and HOXA13) and Group 2 (HOXA/D11 and  
204 HOXD13) HOX-TFs also revealed differences, when we considered the fraction of ChIP-seq  
205 peaks that contained a HOX-TFs binding site (Figure 2D and Supplemental Figure 1C). The  
206 number of peaks carrying a HOX-binding site (i.e. matching one of the top three HOX motifs)  
207 was relatively low in general, ranging from as little as 15% (HOXD9) to 43% (HOXD13).  
208 Interestingly, the three Group 2 HOX-TFs had the highest number of HOX binding sites in  
209 contrast to the Group 1 HOX-TFs, which displayed the lowest number of peaks carrying HOX  
210 binding sites. To exclude the effect of weak and maybe indirect binding sites from the  
211 analysis, we performed the same analysis for the 10,000 and 1,000 strongest peaks  
212 (Supplemental Figure 1C). Although the fraction of binding site-containing peaks slightly  
213 increased, the general distribution stayed the same.

214

## 215 ***De novo* motif analysis finds putative HOX-cofactors**

216 The relatively low numbers of HOX-TF peaks containing HOX binding sites indicated that  
217 other factors might contribute to DNA binding. Sequence analysis of CHIP-seq peaks allows  
218 not only for the detection of sequence-specific binding sites, but also for the identification of  
219 putative cofactors. Therefore, we performed a *de novo* motif analysis using all peaks as input  
220 and then compared the non-HOX like motifs to the literature and to large TF motif databases  
221 (JASPAR (Mathelier et al. 2015), footprint DB (Sebastian and Contreras-Moreira 2014))  
222 (Figure 3).

223 In Group 2 of HOX-TFs, we were not able to detect any clear cofactor motif. In contrast, we  
224 found three putative cofactor motifs in five out of the six Group 1 HOX-TF peak sets. The first  
225 motif was the well-characterized TGANTCA AP1 binding site (Glover and Harrison 1995)  
226 (Figure 3A). A second motif, CGCTCCG was detected with high specificity in the HOXA9 and  
227 HOXD9 peaks and with lower specificity (but still among the top 5) in the HOXA10, HOXD10  
228 and HOXD12 peaks (Supplemental Figure 2A and 2B). This motif was particularly enriched in  
229 HOXA13 peaks (Supplemental Figure 5). We were not able to find matching or similar motifs  
230 in the JASPAR and footprint-DB databases, raising the possibility that it either represented  
231 the binding site of an uncharacterized TF or a composite binding site recognized by a  
232 dimerized TF complex. As a third motif, we detected a 12bp long GC-rich motif in all Group 1  
233 HOX-TF datasets except HOXA13. This motif perfectly matched the known motif of the  
234 CCCTC-binding factor (CTCF), a well described TF involved in gene regulation and genome  
235 architecture (Figure 3A and Supplemental Figure 2)(Barski et al. 2007).

236 The *de novo* discovery of cofactor motifs can be masked by the strong overrepresentation of  
237 the primary motif. To exclude this possibility, we performed a reverse search and identified  
238 and counted all matches to CTCF (Figure 3, Supplemental Figure 3) or AP1 (Supplemental  
239 Figure 4) binding sites in the nine Hox-TF data sets. For the CTCF binding sites, this reverse  
240 search revealed a characteristic difference between Group 1 and Group 2 HOX-TFs.  
241 Altogether, 12-21% of all Group 1 HOX-TF peaks, but only 4-9% of Group 2 HOX-TF peaks  
242 contained a CTCF binding site (Supplemental Figure 3A). In contrast, we identified AP1  
243 binding sites in about 3-6% of all peaks of the different HOX-TFs and there seemed to be no  
244 distinction between Group 1 and Group 2 HOX-TFs (Supplemental Figure 4).

245

246 Next, we mapped the position of the CTCF binding sites within the HOX-TF peaks and found  
247 that in Group 1, but not Group 2, the CTCF sites were located predominantly near the peak  
248 summits (Figure 3B and Supplemental Figure 3B), suggesting a binding mode in which the  
249 HOX-TF binds indirectly via CTCF. This was further supported by a discriminatory motif  
250 analysis, which revealed that Group 1 HOX-TF peaks contained either a HOX or a CTCF  
251 binding site and that only a minority of HOX-TF peaks contained binding sites for both TFs  
252 (Figure 3C).

253

### 254 **Group 1 HOX-TFs and CTCF/cohesin co-bind genome-wide**

255 Motif analysis indicated that CTCF and Group 1 HOX-TFs might co-bind to many sites  
256 throughout the genome. We therefore mapped CTCF binding sites genome-wide by virally  
257 expressing FLAG-tagged CTCF in chMM cultures (Figure 4) and performed ChIP-seq using the  
258  $\alpha$ FLAG antibody. From the same sample, we also performed ChIP-seq for endogenous  
259 RAD21, a subunit of the cohesin complex and an important CTCF-cofactor (Faure et al. 2012).  
260 We identified 22,357 CTCF and 17,589 RAD21 binding sites. Similar to previous reports, CTCF  
261 and RAD21 co-bound to 53% of all CTCF and to 67% of all RAD21 peaks. We then tested how  
262 many HOX-TF peaks overlapped with CTCF or RAD21 peaks. We observed that the  
263 characteristic distinction between Group 1 and Group 2 HOX-TFs could be recapitulated at  
264 ChIP-seq binding sites. Indeed, Group 1 HOX-TFs shared between 15% and 24% of their  
265 peaks with CTCF (12-20% with RAD21), whereas only 3-8% of Group 2 peaks overlapped with  
266 CTCF (3-7% with RAD21) (Figure 4C and Supplemental Figure 6A, B and C).

267 Finally, we investigated the presence of CTCF and HOX binding motifs at shared binding sites  
268 with HOXA10 (Group 1) as a representative example. We looked for underlying binding sites  
269 in the 24% of HOXA10 peaks that are shared with CTCF and observed that 69% of them  
270 contained a CTCF binding site (23% in all HOXA10 peaks). In contrast, only 16% of the peaks  
271 had a HOXA10 binding site (18% in all HOXA10 peaks), suggesting that HOXA10 indirectly  
272 binds to these CTCF-shared peaks via CTCF. Taken together, motif analysis of HOX-TF binding  
273 sites and ChIP-seq for CTCF/RAD21 both found Group 1, but not Group 2 HOX-TF binding  
274 associated with CTCF/cohesion.

275

276

## 277 **Group 1 HOX-TFs and CTCF interact in the nucleus**

278 Both, motif analysis and peak overlap strongly suggested an interaction between Group 1  
279 HOX-TFs and CTCF. To test this possibility, we made use of the proximity ligation assay  
280 (PLA)(Soderberg et al. 2006). The PLA assay allowed us to assess protein-protein interactions  
281 *in situ*, in a quantifiable and sensitive manner. We expressed FLAG-tagged *HOXA10* (Group 1)  
282 in chicken DF1 cells and performed the PLA assay using  $\alpha$ FLAG antibody and an endogenous  
283  $\alpha$ CTCF antibody. We readily detected CTCF-HOXA10 interaction in the nucleus that was  
284 almost as strong as the interaction of CTCF with RAD21, which we used as a positive control  
285 (Figure 4). We also performed the same assay with CTCF and the Group 2 HOXD13 protein,  
286 for which our ChIP-seq data had predicted a weaker interaction. In this case we measured a  
287 signal above our negative control (DF1 cells expressing CTCF alone), but less than for the  
288 CTCF-HOXA10 interaction (Figure 4D and E and Supplemental Figure 7).

289

## 290 **Discussion**

291 In this study, we systematically compared the effect of nine limb-bud expressed HOX-TFs on  
292 the differentiation and gene regulation of primary mesenchymal limb bud cells. Hierarchical  
293 clustering of the regulated genes delineated two groups of HOX-TFs: HOX9/10/11, and  
294 HOXD12/HOXD13 that, during limb development, are expressed in the stylo/zeugopod and  
295 autopod, respectively. The distinction between these two groups is in accordance with  
296 genetic experiments in mice demonstrating that *Hoxd12*, but not *Hoxd11* is able to  
297 substitute for a loss of *Hoxd13* (Kmita et al. 2002). Another interesting observation was that  
298 *HOXA9* and *HOXA13* clustered separately from the other factors. Differences between *HOX9*  
299 and *HOX13* paralogs, in contrast to the more similar *HOX10* and *HOX11* paralogs, were also  
300 apparent in their distinct effects on chMM differentiation. This divergence might be  
301 explained by the fact that the *HOX9* and *HOX13* paralog groups are the only posterior HOX-  
302 TFs which retained all four copies of the genes, thereby reducing the selective pressure on  
303 each paralog and allowing their neo-functionalization (Gehring et al. 2009).

304 Our systematic comparison focused on the effects of individual HOX-TFs and their genome-  
305 wide binding. However, HOX-TFs are rarely expressed alone *in vivo*, but are rather co-  
306 expressed in overlapping patterns and exert their specific function in this biochemical  
307 context. Although HOX-TFs induced distinct effects in our experiments, their combinatorial

308 or antagonistic action *in vivo* might play an important role in the developing embryo.  
309 Investigation of the *in vitro* sequence specificity of individual HOX-TFs showed that their  
310 homeodomains bind largely similar sequences (Berger et al. 2008; Jolma et al. 2013).  
311 Subsequent studies, however, revealed that the binding of cofactors changes the original  
312 HOX binding site resulting in recognition sites that are markedly different (Slattery et al.  
313 2011; Crocker et al. 2015; Jolma et al. 2015). Both observations are reflected in the results of  
314 our ChIP-seq experiments. The low number of direct binding sites in HOX-TF peaks found in  
315 our experiments is in concordance with results from *Drosophila*, where low-affinity binding  
316 sites for the HOX-TF Ultrabithorax (Ubx) in complex with its cofactor Extradenticle (Exd) were  
317 shown to be biologically more significant (Crocker et al. 2015). Our analysis also highlights  
318 the role cofactors play in directing HOX-TF binding. The primary motif for both HOX11  
319 paralogs was in many ways different from the *in vitro* determined monomer specificity and  
320 rather revealed a composite binding site like the one bound by a HOXA10-PBX4 dimer (Jolma  
321 et al. 2015). Furthermore, our data indicate a relationship between HOX-TFs and the AP1  
322 class of TFs. AP1 binding sites were found in 5% of all HOX-TF peaks and *JUN* and *FOS* were  
323 also strongly upregulated by all HOX-TFs, suggesting a mechanism of cofactor cross-  
324 regulation. To our knowledge, AP1 has not been linked to limb patterning or HOX-TFs.  
325 However, these factors are known to be involved in a wide array of developmental and cell  
326 differentiation processes (Hess et al. 2004) and our results suggest AP1 may potentially have  
327 a role in mediating *HOX*-driven limb patterning.

328 PCA analysis separated the HOX-TF binding sites in two subgroups along PC2. We tried to  
329 identify the underlying cause for this distinction between HOX-TF binding sites and found co-  
330 binding with CTCF to correlate with Group 1 HOX-TF binding. We also describe CTCF as a  
331 novel cofactor of Group 1 HOX-TFs. CTCF/cohesin are now well-established factors with  
332 important functions in the spatial organization of the genome into topologically associating  
333 domains (TADs) (Dixon et al. 2012; Zuin et al. 2014; Sanborn et al. 2015). Among other  
334 functions, they have been shown to directly mediate enhancer-promoter contacts (Faure et  
335 al. 2012; Merkenschlager and Odom 2013; Ing-Simmons et al. 2015). The co-occupancy of  
336 CTCF/cohesin and HOX-TFs throughout the genome points to a possible role for this type of  
337 developmental TF in enhancer-promoter communication and beyond. In fact, HOX13 TFs  
338 have recently been implicated as regulators at the *HoxD* locus, where two adjacent TADs  
339 regulate the gene expression in the proximal and distal limb, respectively (Andrey et al.

340 2013; Beccari et al. 2016). Specifically, HOX13 proteins did not regulate individual enhancers,  
341 but rather restructured the chromatin architecture of the locus in a way so that contacts  
342 with one (the telomeric) TAD were repressed, whereas contacts with the other (centromeric)  
343 TAD were promoted (Beccari et al. 2016). A related observation was recently reported in  
344 *Drosophila* for CTCF/Cohesin and Smad-TFs, which are the transcriptional effectors of  
345 TGF $\beta$ /BMP signalling (Van Bortle et al. 2015). The Smad-TFs co-localized in a CTCF-  
346 dependent manner to CTCF binding sites within TADs and might be involved in sculpting the  
347 TAD to enable transcriptional regulation. The observed connection of certain developmental  
348 TFs with CTCF/cohesin architectural proteins suggests an important fundamental regulatory  
349 role for HOX and other TFs that extends beyond the control of individual gene expression.

350 **Literature**

- 351 Andrey G, Montavon T, Mascrez B, Gonzalez F, Noordermeer D, Leleu M, Trono D, Spitz F,  
352 Duboule D. 2013. A Switch Between Topological Domains Underlies HoxD Genes  
353 Collinearity in Mouse Limbs. *Science* **340**.
- 354 Bailey TL, Machanick P. 2012. Inferring direct DNA binding from ChIP-seq. *Nucleic Acids  
355 Research* **40**: e128.
- 356 Barski A, Cuddapah S, Cui K, Roh T-Y, Schones DE, Wang Z, Wei G, Chepelev I, Zhao K. 2007.  
357 High-Resolution Profiling of Histone Methylations in the Human Genome. *Cell* **129**:  
358 823-837.
- 359 Beccari L, Yakushiji-Kaminatsui N, Woltering JM, Necsulea A, Lonfat N, Rodríguez-Carballo E,  
360 Mascrez B, Yamamoto S, Kuroiwa A, Duboule D. 2016. A role for HOX13 proteins in  
361 the regulatory switch between TADs at the HoxD locus. *Genes & Development*  
362 doi:10.1101/gad.281055.116.
- 363 Berger MF, Badis G, Gehrke AR, Talukder S, Philippakis AA, Peña-Castillo L, Alleyne TM,  
364 Mnaimneh S, Botvinnik OB, Chan ET et al. 2008. Variation in Homeodomain DNA  
365 Binding Revealed by High-Resolution Analysis of Sequence Preferences. *Cell* **133**:  
366 1266-1276.
- 367 Boulet AM, Capecchi MR. 2004. Multiple roles of Hoxa11 and Hoxd11 in the formation of the  
368 mammalian forelimb zeugopod. *Development* **131**: 299-309.
- 369 Crocker J, Abe N, Rinaldi L, McGregor Alistair P, Frankel N, Wang S, Alsawadi A, Valenti P,  
370 Plaza S, Payre F et al. 2015. Low Affinity Binding Site Clusters Confer Hox Specificity  
371 and Regulatory Robustness. *Cell* **160**: 191-203.
- 372 Davis AP, Witte DP, Hsieh-Li HM, Potter SS, Capecchi MR. 1995. Absence of radius and ulna  
373 in mice lacking hoxa-11 and hoxd-11. *Nature* **375**: 791-795.
- 374 Dixon JR, Selvaraj S, Yue F, Kim A, Li Y, Shen Y, Hu M, Liu JS, Ren B. 2012. Topological  
375 domains in mammalian genomes identified by analysis of chromatin interactions.  
376 *Nature* **485**: 376-380.
- 377 Dobin A, Davis CA, Schlesinger F, Drenkow J, Zaleski C, Jha S, Batut P, Chaisson M, Gingeras  
378 TR. 2012. STAR: ultrafast universal RNA-seq aligner. *Bioinformatics*  
379 doi:10.1093/bioinformatics/bts635.
- 380 Faure AJ, Schmidt D, Watt S, Schwalie PC, Wilson MD, Xu H, Ramsay RG, Odom DT, Flicek P.  
381 2012. Cohesin regulates tissue-specific expression by stabilizing highly occupied cis-  
382 regulatory modules. *Genome Res* **22**: 2163-2175.
- 383 Gehring WJ, Kloter U, Suga H. 2009. Chapter 2 Evolution of the Hox Gene Complex from an  
384 Evolutionary Ground State. In *Current Topics in Developmental Biology*, Vol Volume  
385 88, pp. 35-61. Academic Press.
- 386 Glover JNM, Harrison SC. 1995. Crystal structure of the heterodimeric bZIP transcription  
387 factor c-Fos-c-Jun bound to DNA. *Nature* **373**: 257-261.
- 388 Grant CE, Bailey TL, Noble WS. 2011. FIMO: scanning for occurrences of a given motif.  
389 *Bioinformatics* **27**: 1017-1018.
- 390 Hess J, Angel P, Schorpp-Kistner M. 2004. AP-1 subunits: quarrel and harmony among  
391 siblings. *Journal of Cell Science* **117**: 5965-5973.
- 392 Ibrahim DM, Hansen P, Rodelsperger C, Stiege AC, Doelken SC, Horn D, Jager M, Janetzki C,  
393 Krawitz P, Leschik G et al. 2013. Distinct global shifts in genomic binding profiles of  
394 limb malformation-associated HOXD13 mutations. *Genome Res* **23**: 2091-2102.

- 395 Ing-Simmons E, Seitan VC, Faure AJ, Flicek P, Carroll T, Dekker J, Fisher AG, Lenhard B,  
396 Merckenschlager M. 2015. Spatial enhancer clustering and regulation of enhancer-  
397 proximal genes by cohesin. *Genome Research* **25**: 504-513.
- 398 Jolma A, Yan J, Whittington T, Toivonen J, Nitta Kazuhiro R, Rastas P, Morgunova E, Enge M,  
399 Taipale M, Wei G et al. 2013. DNA-Binding Specificities of Human Transcription  
400 Factors. *Cell* **152**: 327-339.
- 401 Jolma A, Yin Y, Nitta KR, Dave K, Popov A, Taipale M, Enge M, Kivioja T, Morgunova E, Taipale  
402 J. 2015. DNA-dependent formation of transcription factor pairs alters their binding  
403 specificity. *Nature* **527**: 384-388.
- 404 Joshi R, Passner JM, Rohs R, Jain R, Sosinsky A, Crickmore MA, Jacob V, Aggarwal AK, Honig  
405 B, Mann RS. 2007. Functional specificity of a Hox protein mediated by the recognition  
406 of minor groove structure. *Cell* **131**: 530-543.
- 407 Kmita M, Fraudeau N, Herault Y, Duboule D. 2002. Serial deletions and duplications suggest a  
408 mechanism for the collinearity of Hoxd genes in limbs. *Nature* **420**.
- 409 Kundaje A. 2012. <https://sites.google.com/site/anshulkundaje/projects/idr>. Vol accessed  
410 2013-03-01.
- 411 Landt SG, Marinov GK, Kundaje A, Kheradpour P, Pauli F, Batzoglou S, Bernstein BE, Bickel P,  
412 Brown JB, Cayting P et al. 2012. ChIP-seq guidelines and practices of the ENCODE and  
413 modENCODE consortia. *Genome Research* **22**: 1813-1831.
- 414 Lee TI, Johnstone SE, Young RA. 2006. Chromatin immunoprecipitation and microarray-  
415 based analysis of protein location. *Nat Protoc* **1**: 729-748.
- 416 Love M, Huber W, Anders S. 2014. Moderated estimation of fold change and dispersion for  
417 RNA-seq data with DESeq2. *Genome Biol* **15**: 550.
- 418 Mathelier A, Fornes O, Arenillas DJ, Chen C-y, Denay G, Lee J, Shi W, Shyr C, Tan G, Worsley-  
419 Hunt R et al. 2015. JASPAR 2016: a major expansion and update of the open-access  
420 database of transcription factor binding profiles. *Nucleic Acids Research*  
421 doi:10.1093/nar/gkv1176.
- 422 McGinnis W, Krumlauf R. 1992. Homeobox genes and axial patterning. *Cell* **68**: 283-302.
- 423 Medina-Rivera A, Defrance M, Sand O, Herrmann C, Castro-Mondragon JA, Delerce J, Jaeger  
424 S, Blanchet C, Vincens P, Caron C et al. 2015. RSAT 2015: Regulatory Sequence  
425 Analysis Tools. *Nucleic Acids Research* doi:10.1093/nar/gkv362.
- 426 Merckenschlager M, Odom DT. 2013. CTCF and cohesin: linking gene regulatory elements  
427 with their targets. *Cell* **152**: 1285-1297.
- 428 Quinlan AR, Hall IM. 2010. BEDTools: a flexible suite of utilities for comparing genomic  
429 features. *Bioinformatics* **26**: 841-842.
- 430 Raines AM, Magella B, Adam M, Potter SS. 2015. Key pathways regulated by  
431 HoxA9,10,11/HoxD9,10,11 during limb development. *BMC Dev Biol* **15**: 1-15.
- 432 Rezsohazy R, Saurin AJ, Maurel-Zaffran C, Graba Y. 2015. Cellular and molecular insights into  
433 Hox protein action. *Development* **142**: 1212-1227.
- 434 Sanborn AL, Rao SSP, Huang S-C, Durand NC, Huntley MH, Jewett AI, Bochkov ID, Chinnappan  
435 D, Cutkosky A, Li J et al. 2015. Chromatin extrusion explains key features of loop and  
436 domain formation in wild-type and engineered genomes. *Proceedings of the National  
437 Academy of Sciences* doi:10.1073/pnas.1518552112.
- 438 Sebastian A, Contreras-Moreira B. 2014. footprintDB: a database of transcription factors  
439 with annotated cis elements and binding interfaces. *Bioinformatics* **30**: 258-265.
- 440 Slattery M, Riley T, Liu P, Abe N, Gomez-Alcala P, Dror I, Zhou T, Rohs R, Honig B, Bussemaker  
441 HJ et al. 2011. Cofactor binding evokes latent differences in DNA binding specificity  
442 between Hox proteins. *Cell* **147**: 1270-1282.

- 443 Soderberg O, Gullberg M, Jarvius M, Ridderstrale K, Leuchowius K-J, Jarvius J, Wester K,  
444 Hydbring P, Bahram F, Larsson L-G et al. 2006. Direct observation of individual  
445 endogenous protein complexes in situ by proximity ligation. *Nat Meth* **3**: 995-1000.
- 446 Turner M, Zhang Y, Carlson HL, Stadler HS, Ames JB. 2015. Chemical shift assignments of  
447 mouse HOXD13 DNA binding domain bound to duplex DNA. *Biomolecular NMR*  
448 *Assignments* **9**: 267-270.
- 449 Van Bortle K, Peterson AJ, Takenaka N, O'Connor MB, Corces VG. 2015. CTCF-dependent co-  
450 localization of canonical Smad signaling factors at architectural protein binding sites  
451 in *D. melanogaster*. *cc* **14**: 2677-2687.
- 452 Zakany J, Duboule D. 2007. The role of Hox genes during vertebrate limb development.  
453 *Development* **17**: 359-366.
- 454 Zakany J, Kmita M, Duboule D. 2004. A dual role for Hox genes in limb anterior-posterior  
455 asymmetry. *Science* **304**: 1669-1672.
- 456 Zhang Y, Larsen CA, Stadler HS, Ames JB. 2011. Structural Basis for Sequence Specific DNA  
457 Binding and Protein Dimerization of HOXA13. *PLoS ONE* **6**: e23069.
- 458 Zhang Y, Liu T, Meyer CA, Eeckhoute J, Johnson DS, Bernstein BE, Nusbaum C, Myers RM,  
459 Brown M, Li W et al. 2008. Model-based analysis of ChIP-Seq (MACS). *Genome Biol* **9**:  
460 R137.
- 461 Zuin J, Dixon JR, van der Reijden MI, Ye Z, Kolovos P, Brouwer RW, van de Corput MP, van de  
462 Werken HJ, Knoch TA, van IWF et al. 2014. Cohesin and CTCF differentially affect  
463 chromatin architecture and gene expression in human cells. *Proc Natl Acad Sci U S A*  
464 **111**: 996-1001.
- 465

466 **Figures**



Figure 1

467

468 **Figure 1 Viral expression of HOX-TFs in chicken micromass cultures (chMM) modifies**  
469 **chondrogenic cell differentiation**

470 A) Individual HOX-TF expressing chMM cultures stained with Alcian blue (top) and Eosin (bottom).  
471 Alcian Blue staining of four biological replicates was quantified and compared to mock-infected  
472 chMM. Error bars indicate standard deviation from four replicates.

473 B) Hierarchical clustering of differentially regulated genes in the nine HOX-TF expressing cultures (all  
474 RNA-seq shown in replicates). The top 50 differentially regulated genes from each sample were  
475 selected (Criteria:  $p\text{-val} \leq 10e\text{-}5$ , base mean  $\geq 30$ , fold change  $\geq 2$ ) and for each replicate the log2-  
476 transformed fold changes relative to mock-infected cultures of these 205 genes were subjected to  
477 hierarchical clustering.



Figure 2

478

479 **Figure 2 Genome-wide binding profiles of posterior HOX-TFs reveals two groups of binding**

480 A) ChIP-seq profiles of nine posterior HOX-TFs (Group 1 – blue, Group 2 – black).

481 B) Principal Component Analysis (PCA) analysis of HOX-TF peaks. HOX13 paralogs cluster separate on  
 482 PC1 (dotted rectangle). PC2 reveals two distinct groups of HOX-TFs, Group 1 (blue) and Group 2  
 483 (black).

484 C) *De novo* motif analysis for the HOX-TFs. Primary motifs obtained from the top 5,000 peaks in  
 485 comparison to the previously identified motifs for their respective homeodomains (Berger et al.,  
 486 2008). Group 1 sequence preferences (except HOXA13) are distinct from Group 2. See Supplemental  
 487 Fig. 1B for additional HOX-like motifs identified in the Top 5,000 peaks.

488 D) Quantification of peaks carrying binding sites (sequences matching any of the top 3 HOX-TF  
 489 motifs; FIMO p value  $\leq 0.0001$ ). Each peak carrying a sequence match is counted only once. Binding  
 490 site count in top 1,000 and top 10,000 peaks are shown in Supplemental Figure 1C.

491



Figure3

492

493 **Figure 3 AP1 and CTCF binding sites are overrepresented in Group 1 HOX-TF binding sites**

494 A) *De novo* motif analysis of all Group 1 HOX-TF peaks (here, HOXA10 results) identifies  
 495 overrepresented binding sites. A comparison of these motifs to known AP1 and CTCF motifs is shown  
 496 below.

497 B) Centrimo analysis identifies the position of best binding site matches in all peak sequences. Blue  
 498 and black lines indicate enrichment of the given HOXA10 or HOXD13 motif shown below, respectively.  
 499 Yellow lines indicate enrichment for CTCF motif shown below. CTCF binding sites are centrally  
 500 enriched in HOXA10 peaks.

501 C) The overlap of peaks containing a HOX (Group 1- blue, Group 2- black) or a CTCF (yellow) binding  
 502 site. The red overlap indicates peaks containing a HOX and a CTCF binding site.



Figure 4

503

504 **Figure 4 Group 1 HOX-TFs and CTCF/RAD21 share thousands of binding sites throughout**  
 505 **the genome**

506 A) ChIP-seq tracks of HOXA10, CTCF, RAD21, and HOXD13. Black bars above the CTCF-track indicate  
 507 HOXA10/CTCF co-bound sites.

508 B) Percentage of HOX-TF peaks overlapping with CTCF (yellow) or RAD21 (green) peaks.

509 C) Presence of HOXA10 and CTCF binding sites in the HOXA10-CTCF co-bound peaks.

510 D,E) Proximity Ligation Assay in DF1 chicken fibroblasts. D) Top row: DF1 cells expressing 3xFLAG-  
 511 HOXA10 (left) or 3 x FLAG-HOXD13 (right). PLA was performed using  $\alpha$ FLAG and  $\alpha$ CTCF antibodies.  
 512 Bottom row: Positive Control (left) shows HA-CTCF expressing DF1 cells. PLA was performed with  
 513  $\alpha$ HA and  $\alpha$ RAD21. Negative Control (right) shows non-transfected DF1 cells, PLA performed with  
 514  $\alpha$ FLAG and  $\alpha$ CTCF.

515 E) Quantification of PLA experiments. Contacts were counted with ImageJ and divided by the number  
516 of nuclei in three independent biological replicates (see Supplemental Figure 7). The graph shows the  
517 percentage of counted contacts relative to the positive control. The standard error of the mean is  
518 shown for every sample. A T-test was performed to measure the significance of the contact  
519 difference between HOXA10 and HOXD13 (Student's T p-value<0.005).

## 520 **Material and Methods**

### 521 **Construction of viral vectors and chicken micromass cultures**

522 *HOX* and *CTCF* coding sequences were amplified from chicken embryonic limb buds cDNA  
523 (HH27) and cloned into RCASBP-viruses as previously described (Ibrahim et al. 2013). DF1  
524 cells were transfected in a 6 cm dish with 3  $\mu$ g of each RCASBP(A) plasmid using  
525 Polyethylenimine (Polyscience Inc. #24765-2) and NaCl. Cells were expanded and stressed on  
526 starvation media whereupon the supernatant was harvested on three consecutive days. The  
527 supernatant was then centrifuged to produce the concentrated viral particles of high titer,  
528  $10^8$  viral particles/ml or higher. The infection of chMM cultures and the histological  
529 assessment were performed as described elsewhere (Ibrahim et al. 2013). For the  
530 quantification of chondrogenesis, cultures after 3, 6, 9, 12 and 15 days post infection were  
531 fixed and stained with Alcian Blue. After 2 washes with 1 x PBS, the quantification of  
532 incorporated Alcian Blue was determined by extraction with 6 M guanidine hydrochloride,  
533 followed by photometric measurement at A 595 nm.

534

### 535 **Chromatin preparation and ChIP-sequencing**

536 Chromatin Immunoprecipitation was performed as described previously (Ibrahim et al.  
537 2013), *all experiments were performed in two biological replicates (except HOXA13)*. Briefly,  
538 chMM cultures were harvested after 6 days of culture by adding digestion solution (0.1%  
539 collagenase (Sigma, #C9891) and 0.1% Trypsin in 1x PBS) to obtain a roughly single-cell  
540 suspension. Cells were taken up in 10 ml cold chMM (DMEM: HAMF11 with 10% FBS, 10%  
541 CS, 1% L-glutamine and 1% Penicillin-Streptomycin) medium and fixed for 10 min on ice with  
542 1% formaldehyde. The extraction of nuclear lysate was performed as described in Lee et al.  
543 (2006) and chromatin was sonicated with a Diagenode Bioruptor (45 cycles - 30-sec pulse,  
544 30-sec pause, HI power). For ChIP, 25-35  $\mu$ g of chromatin was incubated with 6-8  $\mu$ g of  
545 antibody overnight. The next day blocked magnetic beads were added and incubated  
546 overnight, followed by 6 washes with RIPA and one with TE (Lee et al. 2006). After elution,  
547 the preparation of the library for pulled down DNA was performed as described previously  
548 (Ibrahim et al. 2013).

549

## 550 **RNA-sequencing**

551 Cells from harvested chMM cultures were separated prior to fixation of the ChIP samples  
552 and RNA was isolated from these cells using an RNaeasy Qiagen kit. RNA-seq libraries were  
553 constructed as described previously (Ibrahim et al. 2013), by selecting for fragment sizes  
554 between 300-500 bp and sequenced single-end 50 bp using Illumina technology.

555

## 556 **Proximity Ligation Assay (PLA)**

557 DF1 cells were transfected with RCASBP(A)-3x FLAG-HOXA10, RCASBP(A)-3x FLAG-HOXD13,  
558 or RCASBP(C)-HA-CTCF, respectively. The cells were cultured for at least 6 days to ensure a  
559 high cellular infection rate. Upon confluency cells were transferred to 10 mm cover slips and  
560 further incubated for one day. Cells were fixed for 10 min with 4% PFA, blocked with TSA  
561 (10% horse serum, 0,5% PerkinElmer blocking reagent [#FP1020] and 0.01% Triton-X-100 in  
562 1x DPBS) and incubated with appropriate primary antibodies (in 10% horse serum in 1x  
563 DPBST) overnight at 4°C. Primary antibody combinations were: 1) FLAG-HOX and CTCF  
564 interaction: m-αFLAG M2 and rb-αCTCF; and 2) HA-CTCF and RAD21 interaction: m-αHA and  
565 rb-αRAD21. Antibody concentration for PLA were tested and used as follows: m-αFLAG M2  
566 1:20000 (Sigma, F1804), m-αHA.11 1:8000 (BioLegends, #901501), rb-αCTCF 1:20000  
567 (ActiveMotif, #61311) and rb-αRAD21 1:1000 (Abcam, ab992).

568 After primary antibody incubation, the PLA assay was performed using the Duolink In Situ  
569 Fluorescence Kit (Sigma, #DUO92101-1KT) according to manufacturer's instructions. Protein-  
570 protein interactions were analyzed by using confocal imaging on a Zeiss LSM700 and the  
571 Axiovert Zen software.

572 For the quantification of PLA experiments, the contacts in several independent frames were  
573 counted using ImageJ and divided by the number of nuclei in the frame. The PLA  
574 experiments were performed in at least two independent experiments.

575

## 576 **Bioinformatic Analyses**

### 577 **ChIP-seq**

578 *Processing and peak analysis*

579 Quality filtering and read mapping were performed as described previously (Ibrahim et al.  
580 2013). Reads were mapped against the *galGal4* reference genome. Reproducible peaks were  
581 identified using the MASC2 (Zhang et al. 2008) peak caller and IDR pipeline (Kundaje 2012;  
582 Landt et al. 2012). For calculating peak overlaps we used bedtools (Quinlan and Hall 2010).  
583 Summits were extended +/-150 bp and two peaks were considered overlapping if the  
584 overlap was  $\geq 100$  bp. The Principal Components Analysis was performed on detected  
585 reproducible peaks as described previously (Ibrahim et al. 2013).

586

### 587 *Sequence analysis and peak overlap*

588 *De novo* motif analysis was performed using the peak-motifs algorithm (Medina-Rivera et al.  
589 2015) and the sequences +/- 75 bp surrounding the respective peak summits. For counting  
590 individual binding sites in the peaks we extracted the sequences +/-150bp surrounding the  
591 peak summit. Next, the position weight matrix (PWM) of the top three motifs that described  
592 the HOX binding site were used together with the FIMO software (Grant et al. 2011) to  
593 obtain the peaks containing a binding site ( $p < 0.0001$ ). Following this, all peaks that had a  
594 sequence match for any of the three motifs were counted as carrying a binding site. A  
595 trimmed version of the CTCF-matrix according to the (Barski et al. 2007)(see Fig. 2) was used  
596 for counting the occurrences of CTCF binding sites,. For Centrimo (Bailey and Machanic  
597 2012) analysis, we used sequences +/- 250 bp of the peak summit and trimmed versions of  
598 the PWMs as seen in the motif logos.

599

### 600 **RNA-seq analysis**

601 RNA-sequencing reads were mapped to the chicken reference genome *galGal4* using the  
602 STAR mapper (Dobin et al. 2012) (splice junctions were based on RefSeq/ENSEMBL gene  
603 annotations; options included: `alignIntronMin 20`, `alignIntronMax 500000`,  
604 `outFilterMultimapNmax 5`, `outFilterMismatchNmax 10`, and `--outFilterMismatchNoverLmax`  
605 `0.1`). Read counts for individual genes were generated for a gene list combining the RefSeq  
606 (*galGal4*) and ENSEMBL (release 75) gene annotations.

607 Log<sub>2</sub> Fold changes for differential expression were calculated using DEseq2 (Love et al.  
608 2014). The top 50 regulated genes were filtered according to  $p$ -value  $< 10^{-5}$ , a minimum base

609 mean >30 and a fold change >2. For hierarchical clustering, all genes were included that  
610 were among the top 50 regulated genes in at least one of the datasets. The log<sub>2</sub>-  
611 transformed fold changes, as compared with control cultures, were then used as the input  
612 for the R heatmap3 hierarchical clustering algorithm.

613

#### 614 **Acknowledgements**

615 IJ was supported by a PhD stipend from the Berlin-Brandenburg School of Regenerative  
616 Therapies. This study was supported by a grant from the Bundesministerium für Bildung und  
617 Forschung (Förderkennziffer FKZ 1315848A) to SM, JH, and PNR. We thank Christina Paliou,  
618 Franziska Martinez Real, Martin Franke and other members of the Mundlos laboratory for  
619 their critical reading of the manuscript.

620

621
